# Supplementary material for: Sequential dehydration of sorbitol to isosorbide over acidified niobium oxides
Source: Royal Society of Chemistry journal article supplement (doi:10.1039/d1cy00326g), 2021-01-01

## Supporting Information

### *Catalysis Science & Technology*

## Sequential dehydration of sorbitol to isosorbide over acidified niobium oxides

Jiaying Guo,<sup>a</sup> Yongji Song,<sup>a</sup> Shanshan Liu,<sup>a</sup> Long Huang,<sup>a</sup> Xincheng Wang,<sup>a\*</sup> Shanshan Liu,<sup>b\*</sup> Cuiqing Li<sup>a</sup>

<sup>a</sup> Beijing Key Laboratory of Enze Biomass Fine Chemicals, Beijing Institute of Petrochemical Technology, Beijing 102617, PR China. E-mail: wxcnathan@gmail.com; wangxc@bipt.edu.cn.

<sup>b</sup> College of Chemical and Biological Engineering, Shandong University of Science and Technology, Qingdao 266590, PR China. E-mail: skd996368@sdust.edu.cn.

### Table of Contents

#### Figures:

**Fig. S1.** X-ray diffraction patterns of acidified Nb<sub>2</sub>O<sub>5</sub> catalysts

**Fig. S2.** (a) NH<sub>3</sub> profiles and (b) FTIR spectra of recycled 2.0 M-SO<sub>4</sub><sup>2-</sup>/Nb<sub>2</sub>O<sub>5</sub> in fingerprint domain after pyridine sorption.

**Fig. S3.** X-ray diffraction patterns of 2.0 M-SO<sub>4</sub><sup>2-</sup>/Nb<sub>2</sub>O<sub>5</sub> after the fifth run.

**Fig. S4.** GC-MS analysis of the reaction solution after 1 h (Reaction conditions: 5 g sorbitol, 1 g 2.0 M-SO<sub>4</sub><sup>2-</sup>/Nb<sub>2</sub>O<sub>5</sub>, catalyst, 130 °C, 6 kPa).

**Fig. S5.** (a) FTIR and (b) Raman spectra of different acids modified Nb<sub>2</sub>O<sub>5</sub> samples.

**Fig. S6.** (a) FTIR and (b) Raman spectra of sulfuric acid acidified Nb<sub>2</sub>O<sub>5</sub> samples.

Fig. S1.

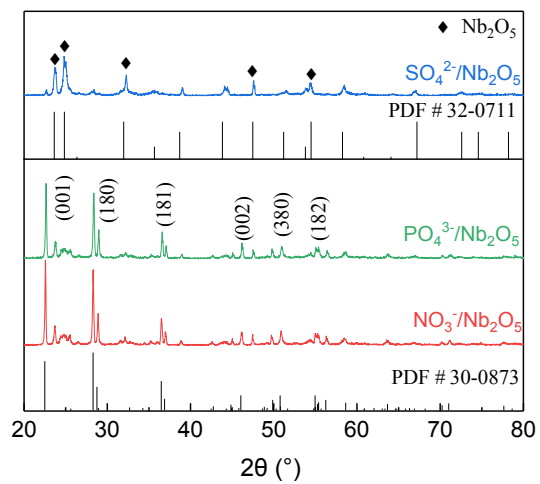

**Fig. S2.**

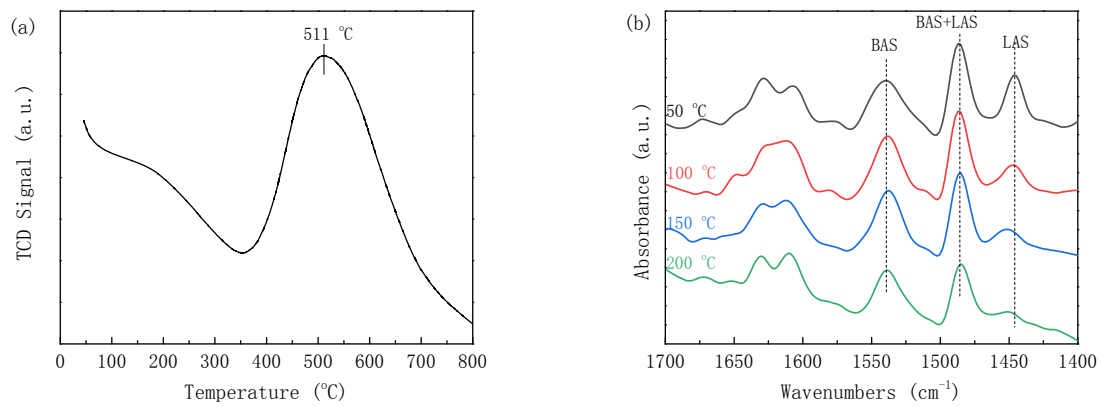

Fig. S3.

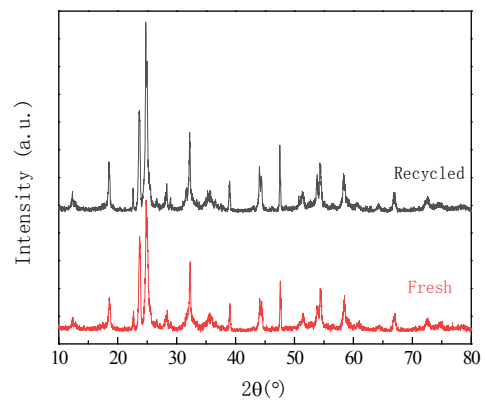

Fig. S4.

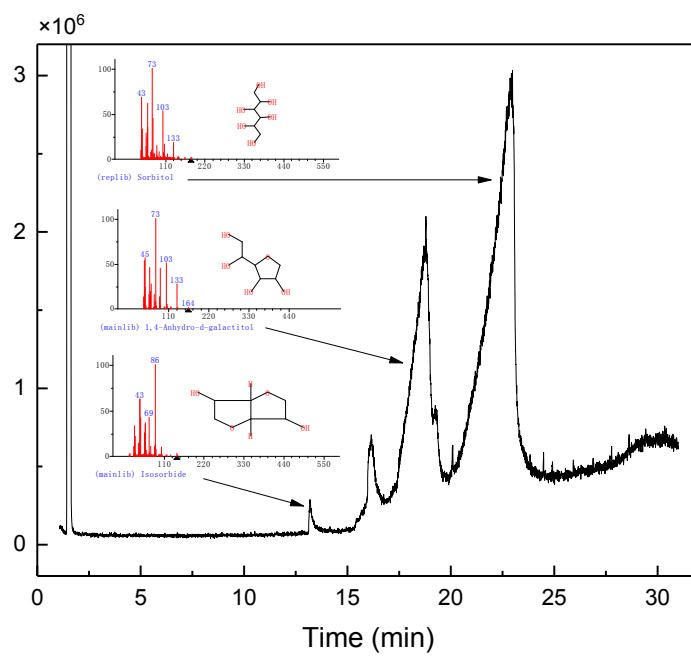

Fig. S5.

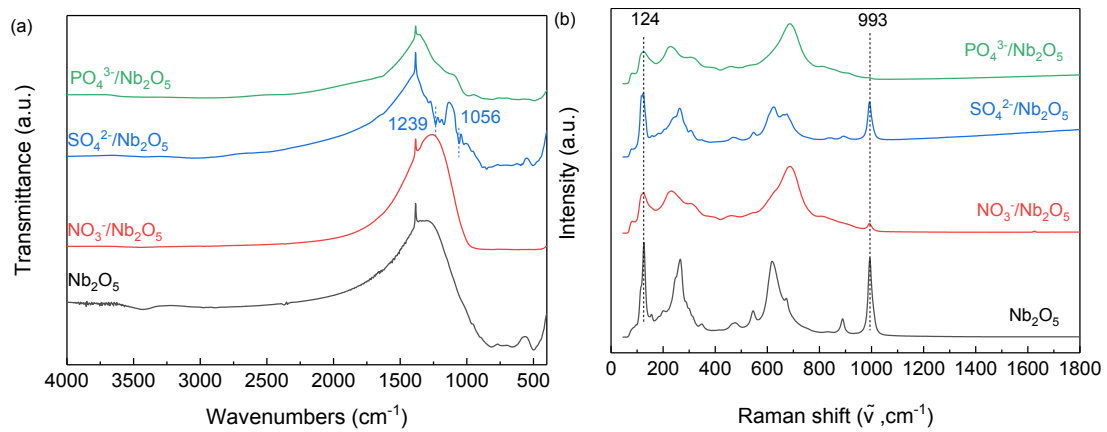

Fig. S6.

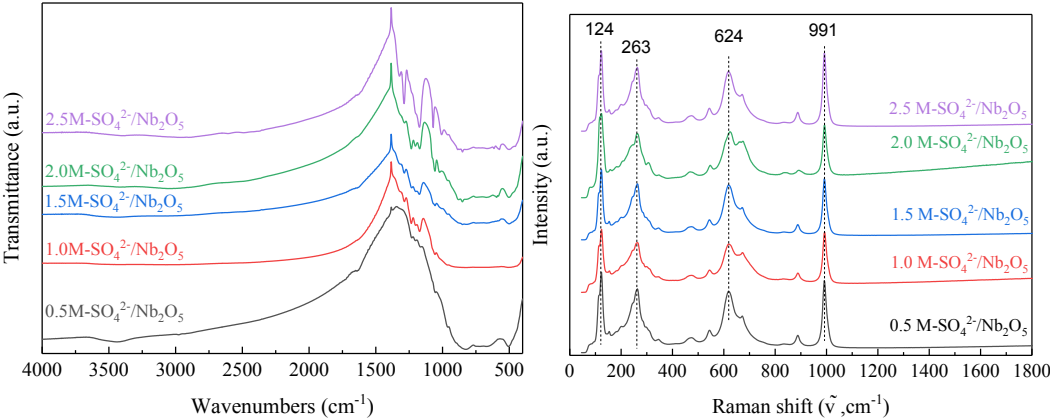

Supplement: d1cy00326g1.pdf [file d1cy00326g1.pdf]
